# Supplementary material
Source: publisher figshare collection journal article supplement (https://acs.figshare.com/ndownloader/files/4212745)
Supplement: Supplementary file 1 [file 4212745]

## Supplementary Information:

### Site-specific incorporation of photocrosslinker and bioorthogonal amino acids into enteric bacterial pathogens

Shixian Lin<sup>†</sup>, Zhenrun Zhang<sup>†</sup>, Hao Xu<sup>§</sup>, Lin Li<sup>§</sup>, She Chen<sup>§</sup>, Jie Li<sup>†</sup>, Ziyang Hao<sup>†</sup> and Peng R. Chen<sup>\*,†,‡</sup>

<sup>†</sup>Beijing National Laboratory for Molecular Sciences, College of Chemistry and Molecular Engineering, Peking University, Beijing 100871, China and <sup>‡</sup>Peking-Tsinghua Center for Life Sciences, Beijing, China; <sup>§</sup>National Institute of Biological Sciences (NIBS), Beijing 102206, China.

## Supplementary Methods

### *General materials and methods*

Bacterial cells were grown in LB broth or on LB agar medium (Sigma). Antibiotics were used at final concentrations of 100  $\mu\text{g ml}^{-1}$  for ampicillin and 34  $\mu\text{g ml}^{-1}$  chloramphenicol (Sigma). Antibodies against shHdeA, SurA, PhoA and OspF were raised in rabbits as described.<sup>1</sup> Antibodies for phosphor-Erk1/2, Erk1/2 were purchased from Cell Signaling Technology. Epitope antibodies Myc and 6xHis were purchased from Santa Cruz Biotechnology. EPEC2348/69, *Shigella flexneri* 2a pcp301 and *Salmonella typhimurium* strains were used for the expression of model proteins and their mutants; *Shigella flexneri* 2a pcp301 ospF deletion strain was generated as described before.<sup>2</sup> Compounds DiZPK and ACPK were synthesized as described previously.<sup>1,3</sup> Congo Red and TCA (trichloroacetic acid) were obtained from Sigma. Biotin-(PEG)<sub>4</sub>-alkyne, Alexa Fluor 488, Streptavidin-HRP and Streptavidin-Alexa Fluor 488 were obtained from Invitrogen.

### *Plasmids construction*

The OspF gene (accession number GI: 56383075) was subcloned into pBAD24 with epitope tag Myc at C-terminus. The N-terminus 50 amino acids truncated version was constructed by subcloning the truncation gene into pBAD24. The pBAD24-OspF-EGFP was constructed by inserting the OspF gene into pEGFP-N1, followed by cloning the entire OspF-EGFP gene into pBAD24. The pSupAR-sal plasmid with *Salmonella* lpp promoter (sal-lpp) was generated from original pSupAR plasmid by replacing the proK promoter with sal-lpp. All mutations used in this study were generated by QuickChange Site-Directed Mutagenesis Kit.

### *Expression and purification of wild-type proteins.*

Alkaline phosphatase (AP) protein was expressed in the cytoplasm of *E. coli* BL21(DE3) cells and purified by anion exchange column Q-FF (GE Healthcare). GST-Erk2 and phosphor-GST-Erk2 were

obtained as described.<sup>2</sup> shHdeA-Myc-His<sub>6</sub> proteins with DiZPK incorporated into positions 58 was obtained as described.<sup>1</sup> Protein concentrations were determined by the BCA (bicinchoninic acid) method (Pierce), with BSA as a standard.

### **Native PAGE analysis.**

The native PAGE gel was prepared using Bio-Rad Mini-PROTEAN Tetra Electrophoresis System (Figure. S8A). SDS was removed from the ingredients of both the stacking gel (pH 6.8, 5%) and the resolving gel (pH 8.8, 15%). All the protein samples were prepared in Tris buffer containing bromophenol blue, native running buffer (1 L) was consisted of 14.4 g glycine and 3.03 g Tris base plus ddH<sub>2</sub>O. Samples were run under ice-cold condition (150 V, 400 mA, 60 min). Soybean trypsin inhibitor (from Beijing Biodee Biotechnology Co.,Ltd, pI=4.6, MW~21 kDa) was used as the marker protein (for wild-type shHdeA protein, pI=5.2).

### **Supplementary Results**

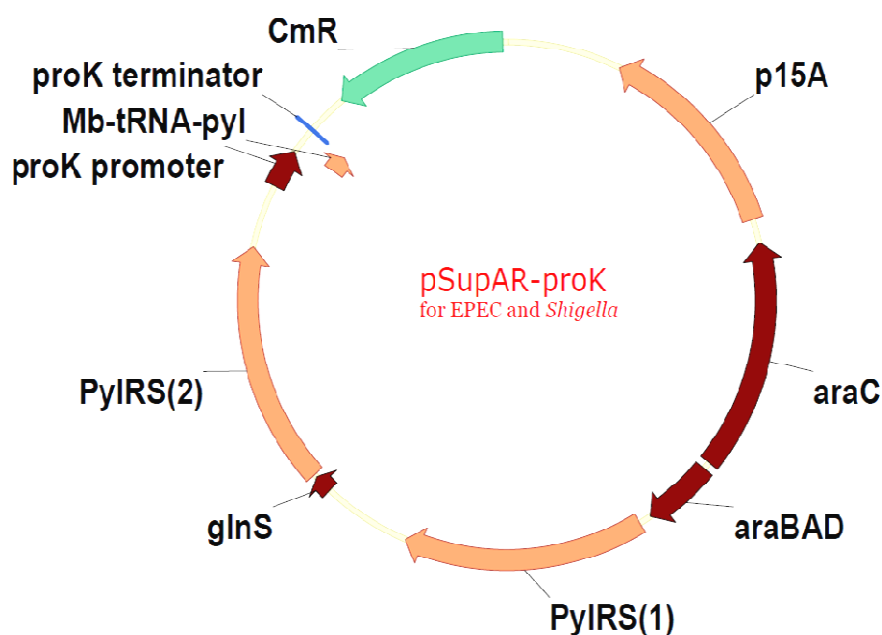

**Figure S1.** Plasmid map of pSupAR used in EPEC and *Shigella*.

*E.coli K12* -AGGCATTTTGCTATTAAGGGATTGACGAGGGCGTTC-TGCGCA---GTAAGATGCGCCCGCATT  
*EPEC 2348/69* -AGGCATTTTGCTATTAAGGGATTGACGAGGGCGTTC-TGCGCA---GTAAGATGCGCCCGCATT  
*Shigella flexneri 2a* -AGGCATTTTGCTATTAAGGGATTGACGAGGGCGTTC-TGCGCA---GTAAGATGCGCCCGCATT  
*Salmonella typhimurium* ATTGTATTTTGCGACTAAGGGATTGACGGGCGTTCGCGCTGACCA---GTAAGATGCGCCC-GCATT  
*Yersinia petis* --TGC-TCATCCCAACCAGTTTCACACCGCAGCCACACTCCACAAACGACAAACCAACCCGAAT-

**Figure S2.** Alignment of proK tRNA promoters from *E.coli K12*, EPEC 2348/69, *Shigella flexneri 2a*, *Salmonella typhimurium* and *Yersinia petis*. The alignment was performed with Vector NTI (Invitrogen).

*E.coli K12* CCCATC AAAAAAATATTCTCAACATAAAAAAC TTTGTGTAATACTTGTAAACGCT  
*EPEC 2348/69* CCCATC AAAAAAATATTCTCAACATAAAAAAC TTTGTGTAATACTTGTAAACGCT  
*Shigella flexneri 2a* CCCATC AAAAAAATATTCTCAACATAAAAAAC TTTGTGTAATACTTGTAAACGCT  
*Salmonella typhimurium* CCCATC AAAAAAATATTCTCAACATAAAAAAG TTTGTGTAATACTTGTAAACGCT  
*Yersinia petis* ----- AAAAAATTATTCTCTTTCG AAAAAAC TTTGTGTAATACTTGTAAACGCT

**Figure S3.** Alignment of lpp tRNA promoters from *E.coli K12*, EPEC 2348/69, *Shigella flexneri 2a*, *Salmonella typhimurium* and *Yersinia petis*. The alignment was performed with Vector NTI (Invitrogen).

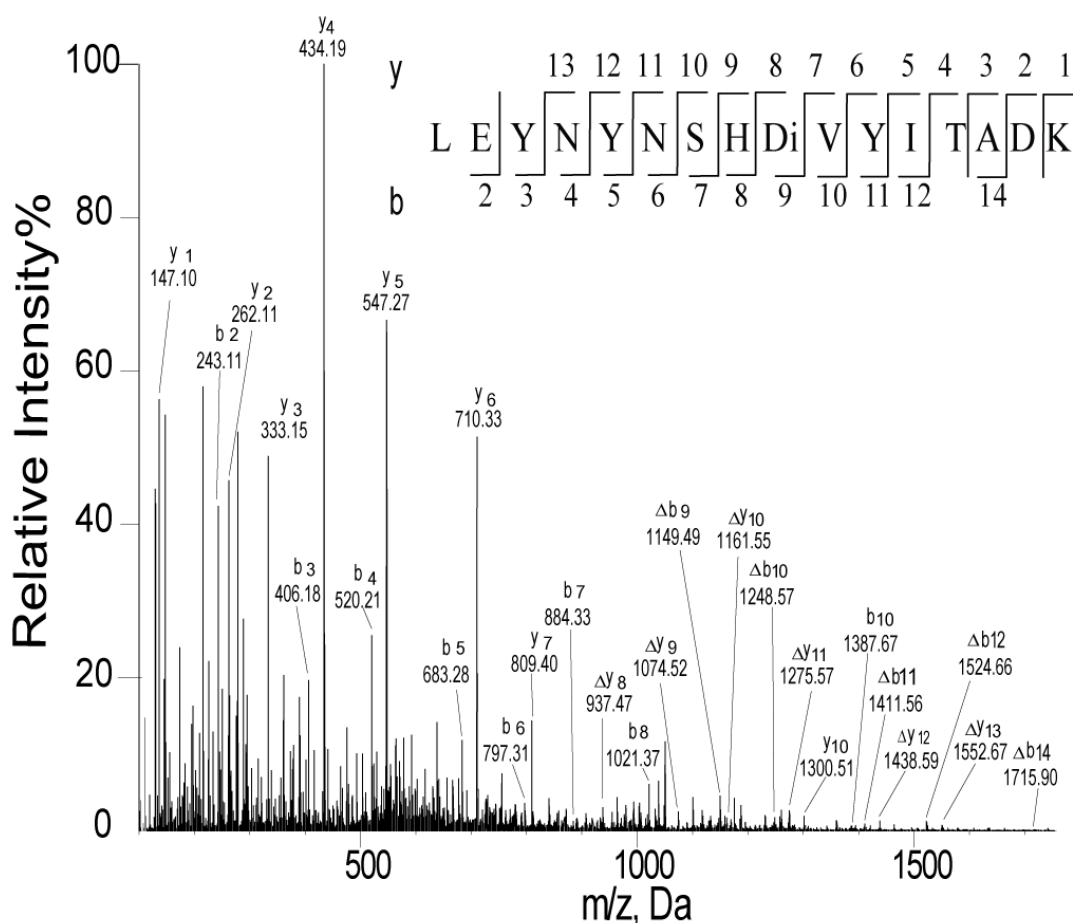

**Figure S4.** Mass spectrometry analysis of GFP protein carrying DiZPK expressed in *Salmonella*. MS/MS of GFP149-DiZPK. Amino acid **Di** represents the DiZPK. The b and y ion are marked in the spectrum. The amino acid sequence of the peptide is shown at the top of the figure. Δ: neutral loss of a 139 Da ( $C_6H_9N_3O$ ) .

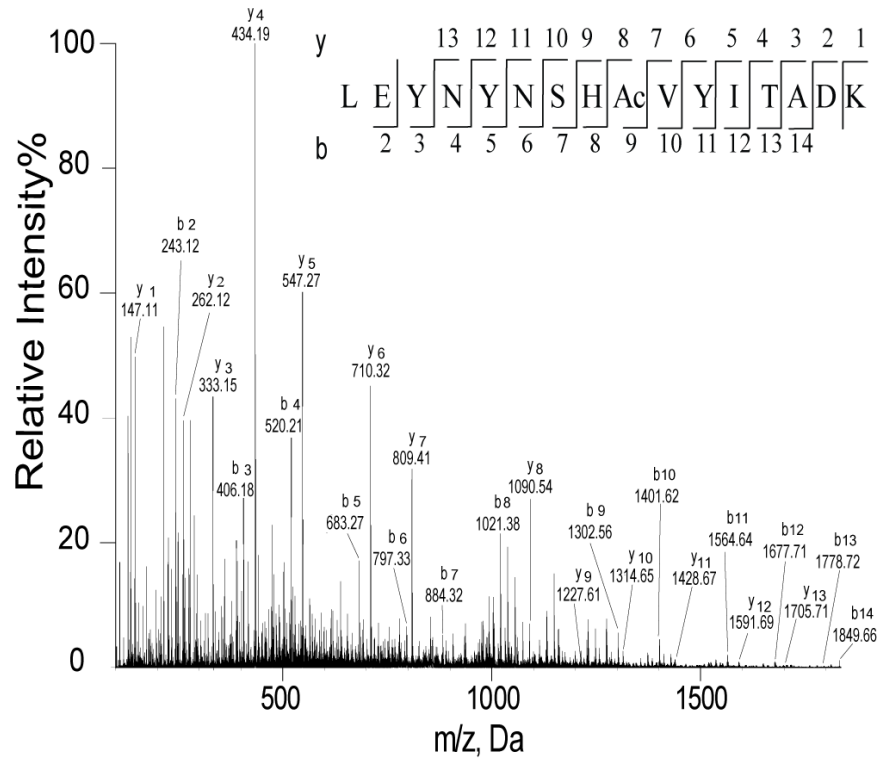

**Figure S5.** Mass spectrometry analysis of GFP protein carrying ACPK expressed in *Salmonella*. MS/MS of GFP149-ACP. Amino acid **Ac** represents ACPK. The b and y ion are marked in the spectrum. The amino acid sequence of the peptide is shown at the top of the figure.

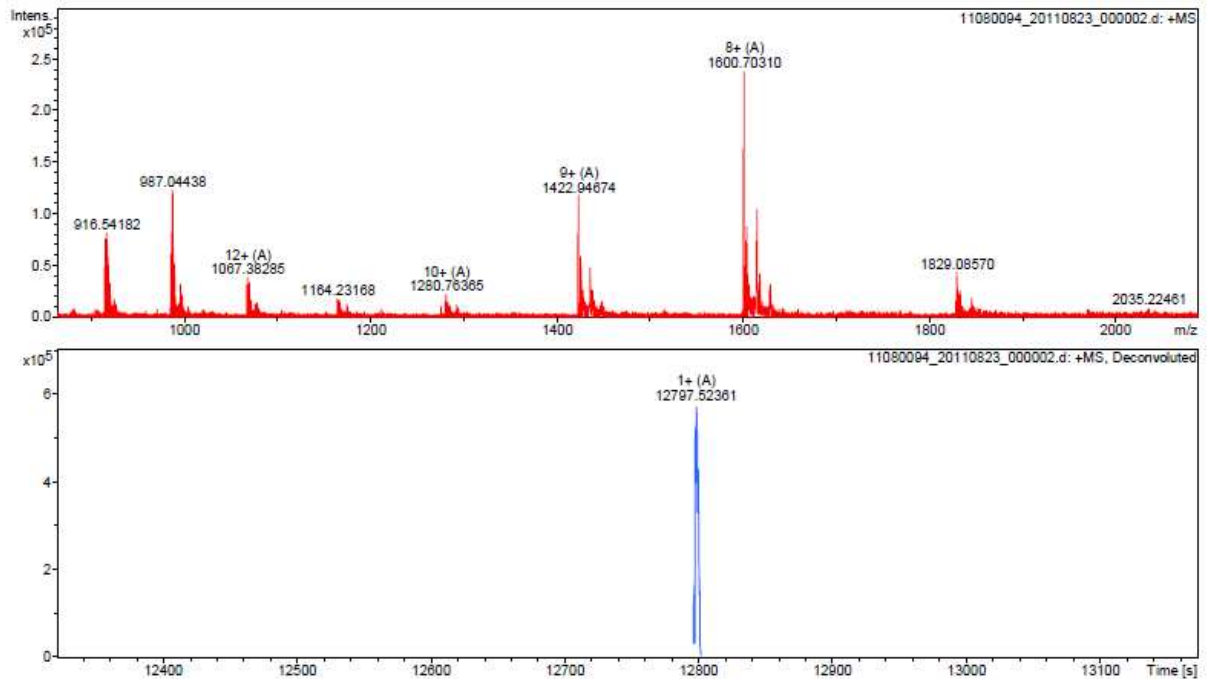

**Figure S6.** Mass spectrometry of shHdeA protein carrying DiZPK expressed in *Shigella*. ESI-MS analysis of shHdeA58-DiZPK. To verify that DiZPK was encoded in *Shigella* without being modified, the mass of purified full length shHdeA carrying DiZPK at residue V58 site was measured using electrospray ionization mass spectrometry (ESI-MS), which gave a measured mass of 12798Da (expected: 12799 Da).

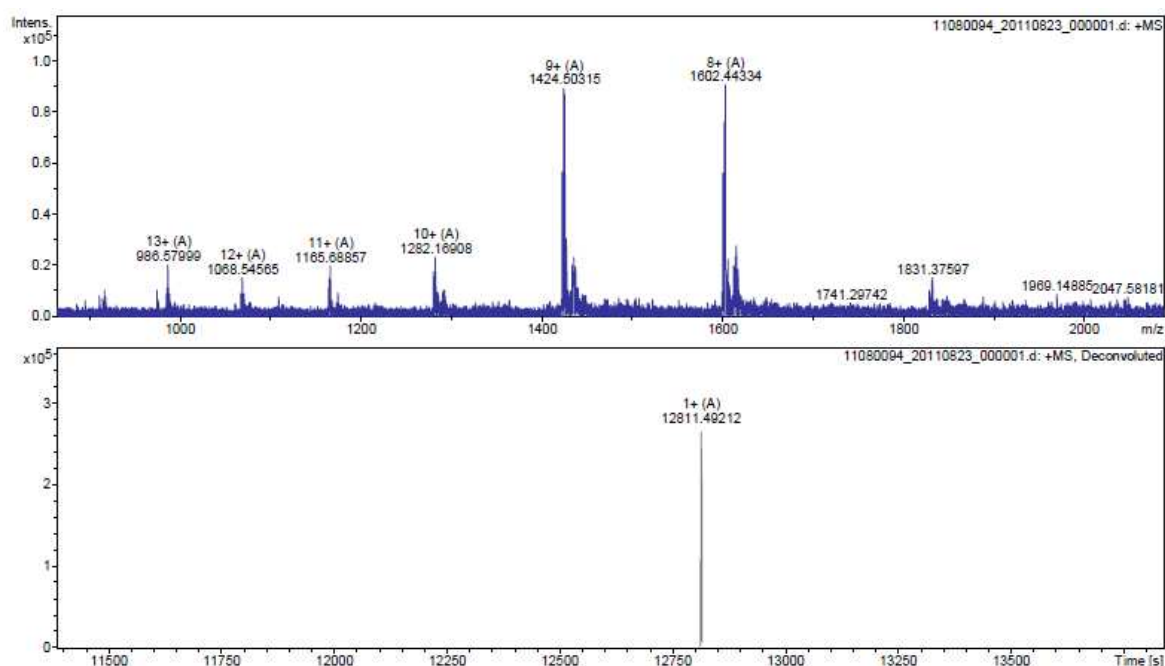

**Figure S7.** Mass spectrometry of shHdeA protein carrying ACPK expressed in *Shigella*. ESI-MS analysis of shHdeA58-ACP. To verify that ACPK was incorporated in the *Shigella* without being modified, the mass of purified full length shHdeA carrying ACPK at residue V58 site was measured using electrospray ionization mass spectrometry (ESI-MS), which gave a measured mass of 12811Da (expected: 12813 Da).

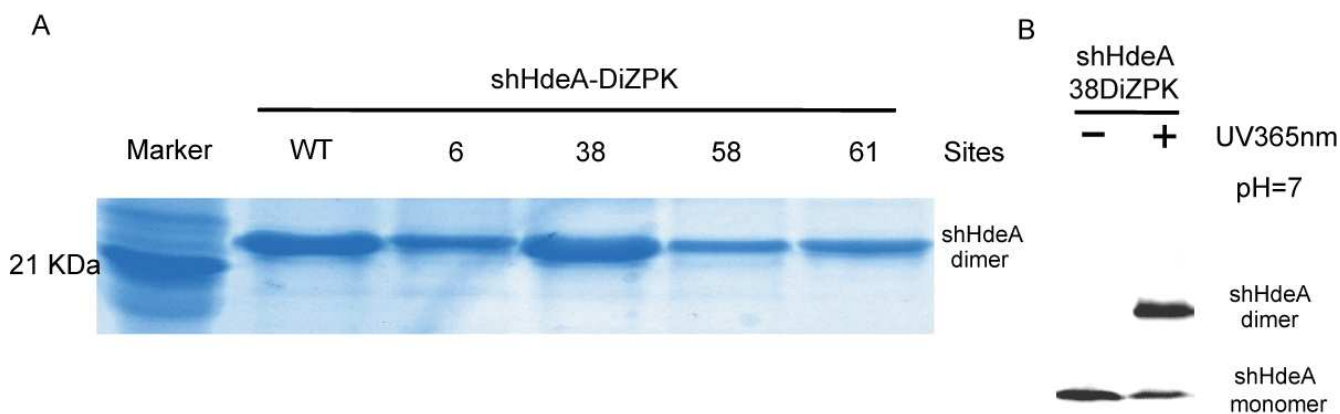

**Figure S8.** Incorporation of DiZPK into indicated positions of shHdeA. (A) Native PAGE analysis of shHdeA proteins carrying DiZPK at the indicated positions using shHdeA-WT as a positive control. All the variants formed dimmers with no detectable monomers. (B) Photocrosslinking of live *Shigella* cells harboring shHdeA-38DiZPK at pH =7 with or without UV irradiation. Majority of the shHdeA variant proteins became covalently linked dimers upon UV irradiation at pH =7.

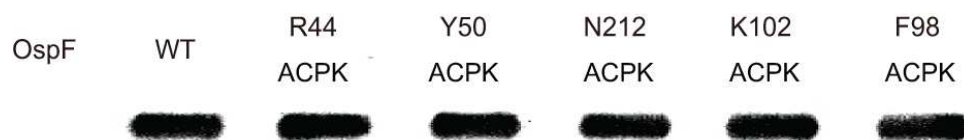

**Figure S9.** The OspF protein concentrations in cell lysate were adjusted to the same level by judging from immunoblotting analysis using the anti-Myc antibody.

**Supplementary Table 1.** Summary of the mass spectrometry result on the identified shHdeA client proteins (protein photocrosslinking was performed on shHdeA58-DiZPK at pH 2.3 in living *Shigella* cells)

| Accession number | Protein name          | Number of matched peptides | MASCOT score | Brief Description                                                |
|------------------|-----------------------|----------------------------|--------------|------------------------------------------------------------------|
| gil110805876     | AraF                  | 24                         | 37795        | a component of the high affinity L-arabinose transport system    |
| gil56383414      | OppA                  | 39                         | 10357        | a component of the binding protein-dependent transport system    |
| gil24112179      | GlnH                  | 24                         | 6308         | a component of glutamine transport system                        |
| gil24113539      | MglB                  | 23                         | 6042         | a periplasmic galactose binding protein                          |
| gil24113682      | ArgT                  | 19                         | 5176         | a periplasmic lysine arginine ornithine binding protein          |
| gil56480072      | GlpQ                  | 23                         | 3627         | an enzyme that catalyzes the hydrolysis of glycerophosphodiester |
| gil24115375      | MalE                  | 27                         | 3398         | a periplasmic maltose binding protein                            |
| gil24111499      | SurA                  | 24                         | 3320         | a periplasmic peptidyl-prolyl cis-trans isomerase                |
| gil24114813      | DppA                  | 31                         | 2261         | a periplasmic dipeptide transport system                         |
| gil24114218      | AnsB (L-asparaginase) | 18                         | 2147         | an enzyme that catalyzes the hydrolysis of asparagine            |
| gil24115464      | YtfQ                  | 20                         | 2028         | ABC transporter periplasmic-binding protein                      |
| gil24113681      | HisJ                  | 15                         | 1693         | a periplasmic histine binding protein                            |
| gil24114521      | DegP                  | 18                         | 1506         | a periplasmic serine endoprotease                                |

|              |      |    |      |                                                                                                        |
|--------------|------|----|------|--------------------------------------------------------------------------------------------------------|
| gil56383440  | PRC  | 20 | 1432 | A Periplasmic tail-specific protease                                                                   |
| gil56479804  | MdoG | 27 | 1356 | a periplasmic Glucans biosynthesis protein                                                             |
| gil56479781  | OmpA | 12 | 1010 | an outer membrane protein which have a periplasmic domain                                              |
| gil24112266  | LolA | 11 | 865  | an outer membrane lipoprotein carrier protein which have lipoproteins anchored to the periplasmic side |
| gil83287997  | YggE | 9  | 862  | a uncharacterized protein                                                                              |
| gil24113600  | OmpC | 14 | 727  | an outer membrane protein which have a periplasmic domain                                              |
| gil24114713  | UgpB | 17 | 691  | a periplasmic glycerol-3-phosphate binding protein                                                     |
| gil56480566  | CpdB | 21 | 689  | a periplasmic 2',3'-cyclic phosphodiesterase (3'-nucleotidase)                                         |
| gil24112526  | PotD | 17 | 670  | a periplasmic spermidine/putrescine binding protein                                                    |
| gil24114795  | YhjJ | 16 | 610  | a uncharacterized protein                                                                              |
| gil24111612  | YaeT | 8  | 496  | a membrane protein which helps the assemble of outer membrane proteins                                 |
| gil24114842  | XylF | 10 | 446  | a periplasmic D-xylose binding protein                                                                 |
| gil24114147  | DsbC | 6  | 435  | a periplasmic thiol and disulfide inter change protein                                                 |
| gil56383845  | MDH  | 11 | 348  | a periplasmic malate dehydrogenase                                                                     |
| gil24114628  | PpiA | 6  | 346  | a Periplasmic peptidyl prolyl cis-trans isomerases                                                     |
| gil161486476 | ZnuA | 9  | 342  | a periplasmic Zinc uptake system component                                                             |
| gil56480517  | NrfA | 9  | 289  | a component of periplasmic nitrite reductase complex                                                   |
| gil24115149  | PDI  | 11 | 283  | a periplasmic protein disulfide isomerase I                                                            |
| gil24114611  | SlyD | 10 | 263  | a FKBP-type peptidyl prolyl isomerases                                                                 |
| gil313648524 | DegQ | 12 | 261  | a periplasmic serine endoprotease                                                                      |
| gil24114741  | NikR | 4  | 258  | a periplasmic nickel responsive regulator                                                              |

|              |      |   |     |                                                                          |
|--------------|------|---|-----|--------------------------------------------------------------------------|
| gil24111633  | MetQ | 9 | 257 | a D-methionine-binding lipoprotein                                       |
| gil281601895 | YfgC | 7 | 243 | a Tetratricopeptide repeat-containing protein                            |
| gil56480524  | AphA | 6 | 237 | a periplasmic acid phosphatase class B                                   |
| gil56480161  | ProX | 4 | 212 | a periplasmic glycine betaine binding protein                            |
| gil24113046  | SodB | 5 | 196 | a superoxide dismutase                                                   |
| gil24111893  | PpiB | 6 | 192 | a periplasmic peptidyl-prolyl cis-trans isomerase B                      |
| gil24115625  | CreA | 2 | 177 | a putative periplasmic protein                                           |
| gil56479975  | YebF | 2 | 169 | a protein contain a signal sequence for its secretion to periplasm       |
| gil56480115  | NlpB | 3 | 166 | a lipoprotein 34                                                         |
| gil24113809  | BCP  | 4 | 157 | a putative peroxiredoxin bcp                                             |
| gil24112031  | FUR  | 6 | 141 | a ferric uptake regulation protein                                       |
| gil56479691  | TolB | 9 | 135 | a component of Tol-dependent translocation system                        |
| gil32699529  | PtrA | 7 | 125 | a protease                                                               |
| gil24111953  | AhpC | 3 | 114 | an alkyl hydroperoxide reductase subunit C                               |
| gil24051610  | SapA | 8 | 110 | a peptide transport periplasmic protein                                  |
| gil56480408  | TnaA | 4 | 100 | a tryptophanase                                                          |
| gil56404025  | UshA | 1 | 92  | a bifunctional UDP-sugar hydrolase/5'-nucleotidase periplasmic precursor |
| gil313646493 | CueO | 1 | 89  | a blue copper oxidase cueO                                               |
| gil56479896  | GapA | 2 | 82  | a glyceraldehyde-3-phosphate dehydrogenase A                             |
| gil24114369  | YqjI | 1 | 81  | a uncharacterized protein                                                |
| gil24114342  | RibB | 2 | 76  | a 3,4-dihydroxy-2-butanone 4-phosphate synthase                          |



|              |                                           |   |    |                                                       |
|--------------|-------------------------------------------|---|----|-------------------------------------------------------|
| gil189030834 | NanM                                      | 3 | 76 | a N-acetylneuraminate epimerase                       |
| gil24115188  | FdoG                                      | 3 | 75 | a formate dehydrogenase-O major subunit               |
| gil24112719  | TPX                                       | 1 | 69 | a thiol peroxidase                                    |
| gil24115187  | FdoH                                      | 1 | 66 | a formate dehydrogenase-O iron-sulfur subunit         |
| gil56480284  | LptA                                      | 1 | 61 | a lipopolysaccharide export system protein            |
| gil56480149  | KgtP                                      | 1 | 59 | an alpha-ketoglutarate permease                       |
| gil56479605  | LpdA                                      | 4 | 56 | a dihydrolipoyl dehydrogenase                         |
| gil24111599  | Serine<br>endoprotease                    | 2 | 53 | serine endoprotease                                   |
| gil24114481  | YrbC                                      | 4 | 52 | a ABC transporter periplasmic binding protein<br>MlaC |
| gil56479649  | TSX                                       | 2 | 48 | a nucleoside-specific channel-forming protein         |
| gil24112270  | DmsB                                      | 1 | 48 | an anaerobic dimethyl sulfoxide reductase<br>chain B  |
| gil56480520  | YjcO                                      | 2 | 47 | a uncharacterized protein                             |
| gil24113186  | Putative transport<br>periplasmic protein | 1 | 46 | putative transport periplasmic protein                |
| gil24111675  | PhoA                                      | 2 | 46 | A periplasmic alkaline phosphatase                    |

\*Blue lanes represent the proteins are well known substrates of shHdeA for *in vitro* study before. Red lanes represent the proteins have been identified by our recent work in *E. coli*.<sup>1</sup> Black lanes represent additional client proteins identified from this study. These proteins were ranked by the MASCOT score and only client proteins with a score above 45 were selected.

## References

- (1) Zhang, M.; Lin, S.; Song, X.; Liu, J.; Fu, Y.; Ge, X.; Fu, X.; Chang, Z.; Chen, P. R. *Nat. Chem. Biol.* **2011**, 7, 671-677.
- (2) Li, H.; Xu, H.; Zhou, Y.; Zhang, J.; Long, C.; Li, S.; Chen, S.; Zhou, J.-M.; Shao, F. *Science*. **2007**, 315, 1000-1003.
- (3) Hao, Z.; Song, Y.; Lin, S.; Yang, M.; Liang, Y.; Wang, J.; Chen, P. R. *Chem. Comm.* **2011**, 47, 4502-4504.

Complete ref 35:

Reference Type: Journal Article

Record Number: 35

Author: M. T. G. Holden, E. J. Feil, J. A. Lindsay, S. J. Peacock, N. P. J. Day, M. C. Enright, T. J. Foster, C. E. Moore, L. Hurst, R. Atkin, A. Barron, N. Bason, S.

Year: 2004

Title: Complete genomes of two clinical Staphylococcus aureus strains: Evidence for the rapid evolution of virulence and drug resistance

Journal: Proc. Natl. Acad. Sci. USA

Volume: 101

Issue: 26

Pages: 9786-9791

Date: Jun 29

Short Title: Complete genomes of two clinical Staphylococcus aureus strains: Evidence for the rapid evolution of virulence and drug resistance

ISSN: 0027-8424

DOI: 10.1073/pnas.0402521101

Accession Number: WOS:000222405600049

Notes: Times Cited: 303

URL: <Go to ISI>://WOS:000222405600049
